# Supplementary material for: Synergetic effect of Lewis acid and base in modified Sn-β on the direct conversion of levoglucosan to lactic acid
Source: Royal Society of Chemistry journal article supplement (doi:10.1039/d0cy00089b), 2020-01-01
Supplement: d0cy00089b1.pdf [file d0cy00089b1.pdf]

## Synergistic effect of Lewis acid and base in modified Sn- $\beta$ on direct conversion of levoglucosan to lactic acid

Wenda Hu,<sup>a,c</sup> Zixin Chi,<sup>a</sup> Yan Wan,<sup>a</sup> Shuai wang,<sup>a</sup> Jingdong Lin,<sup>a</sup> Shaolong Wan<sup>\*a,b</sup> and Yong Wang<sup>\*c</sup>

<sup>a</sup>College of Chemistry and Chemical Engineering, Xiamen 361005, China

<sup>b</sup>National Engineering Laboratory for Green Chemical Productions of Alcohols-Ethers-Esters, Xiamen 361005, China

<sup>c</sup>Voiland School of Chemical Engineering and Bioengineering Washington State University, Pullman, Washington 99164, United States.

Corresponding authors:

Shaolong Wan, swan@xmu.edu.cn and Yong Wang, Wang42@wsu.edu.

**Keywords:** modified Sn- $\beta$ , lactic acid, levoglucosan, synergistic effect

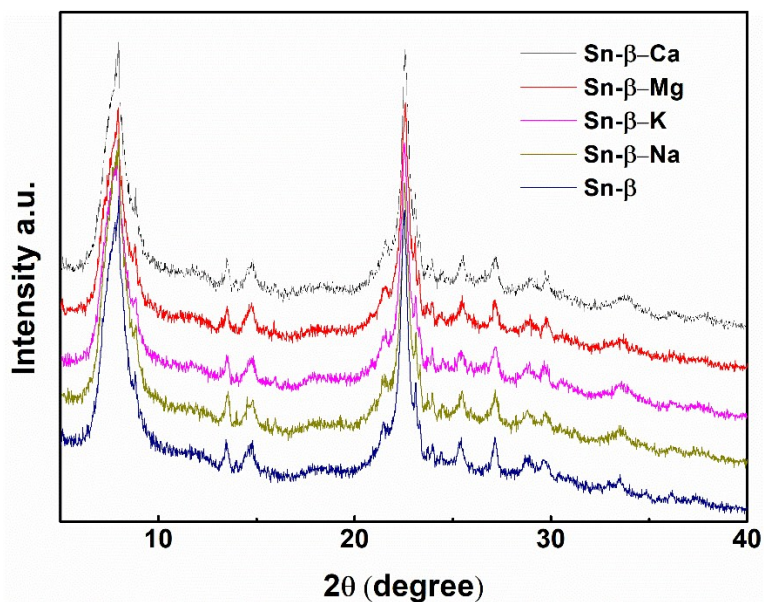

**Figure S1.** Powder XRD patterns of different zeolites.

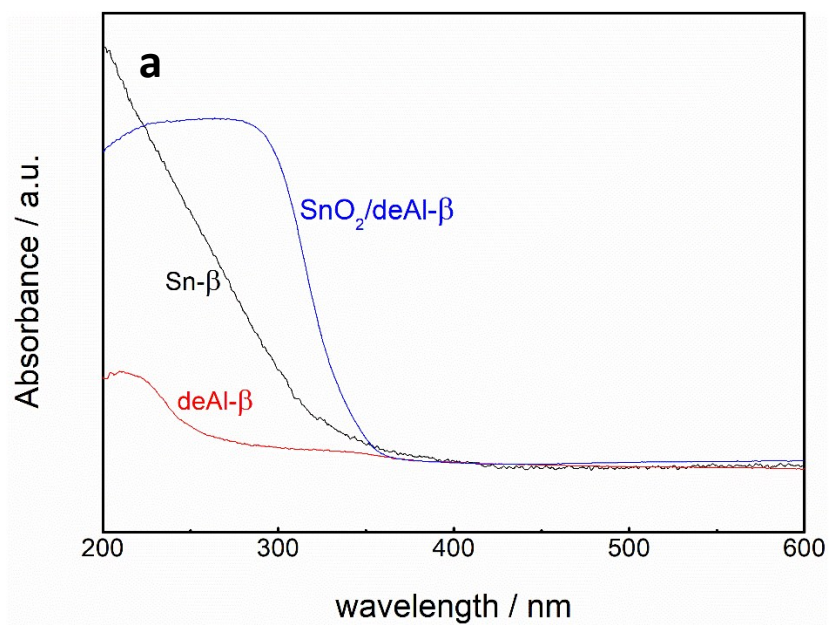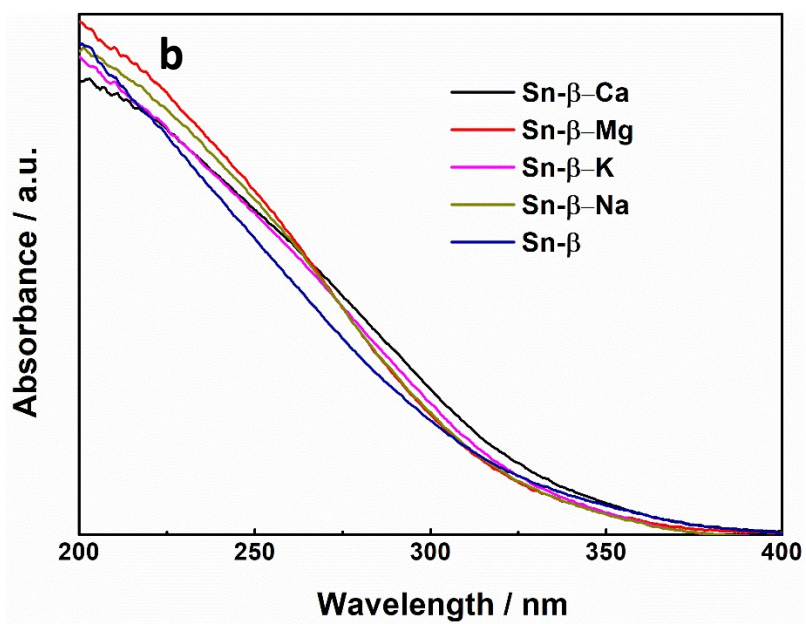

**Figure S2.** UV-Vis spectra of deAl- $\beta$ , Sn- $\beta$  and SnO<sub>2</sub>/deAl- $\beta$ (a) and cations modified Sn- $\beta$  (b)

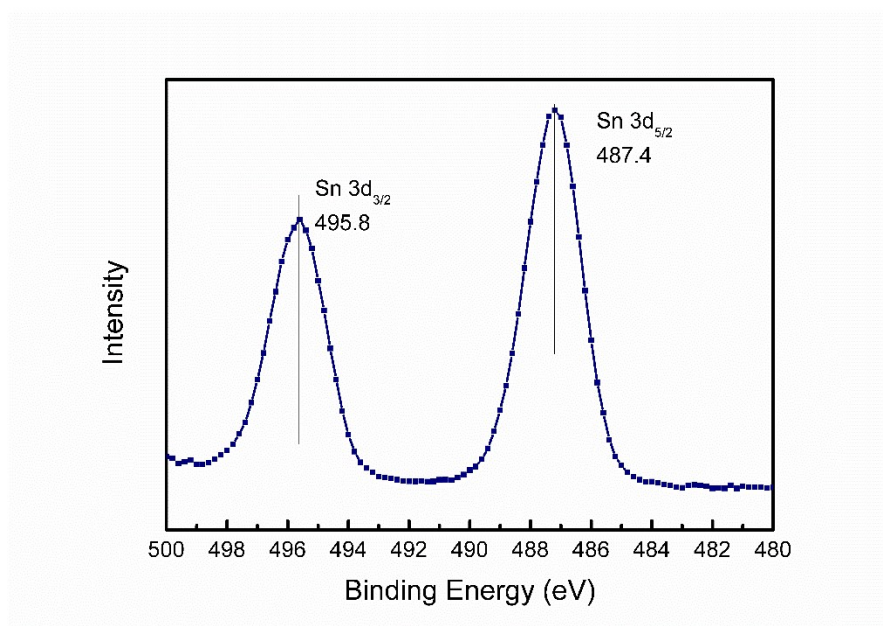

**Figure S3.** XPS of Sn-β sample.

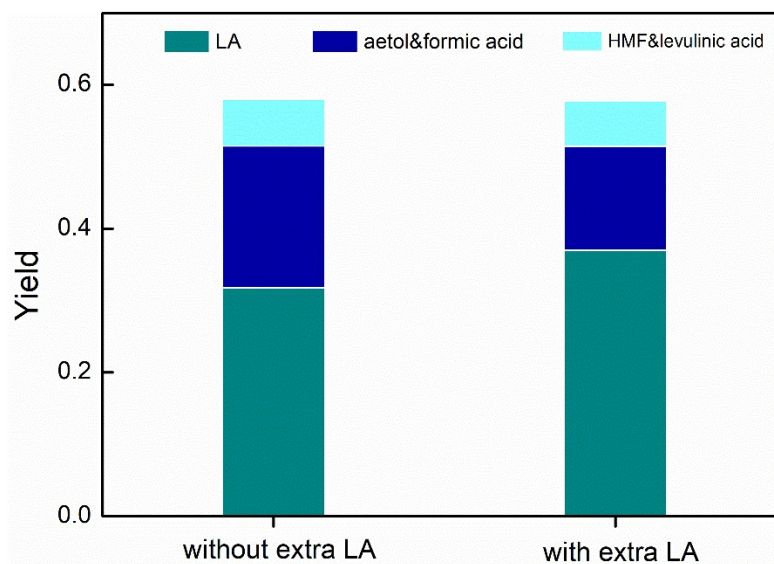

**Figure S4.** The effects of extra added lactic acid on the conversion of levoglucosan.

Reaction conditions: Sn-β 200 mg; lactic acid 0.2 mmol; levoglucosan 0.05 g; H<sub>2</sub>O 20 mL; N<sub>2</sub> 2 MPa; 190°C; time 6 h (without external LA); 2 h (with external LA).

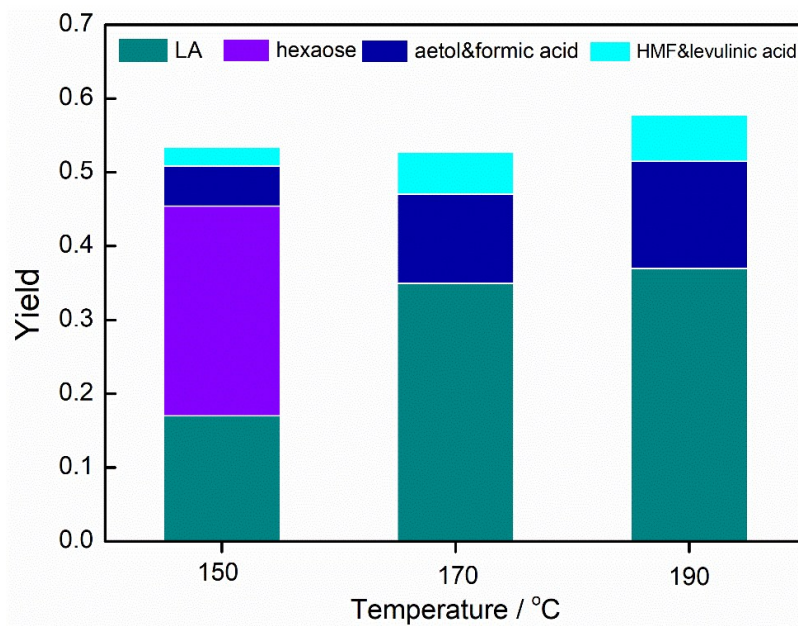

**Figure S5.** The effects of reaction temperature on the conversion of levoglucosan.  
Reaction conditions: cat. 200 mg; lactic acid 0.2 mmol; levoglucosan 0.05 g; H<sub>2</sub>O 20 mL; N<sub>2</sub> 2 MPa;

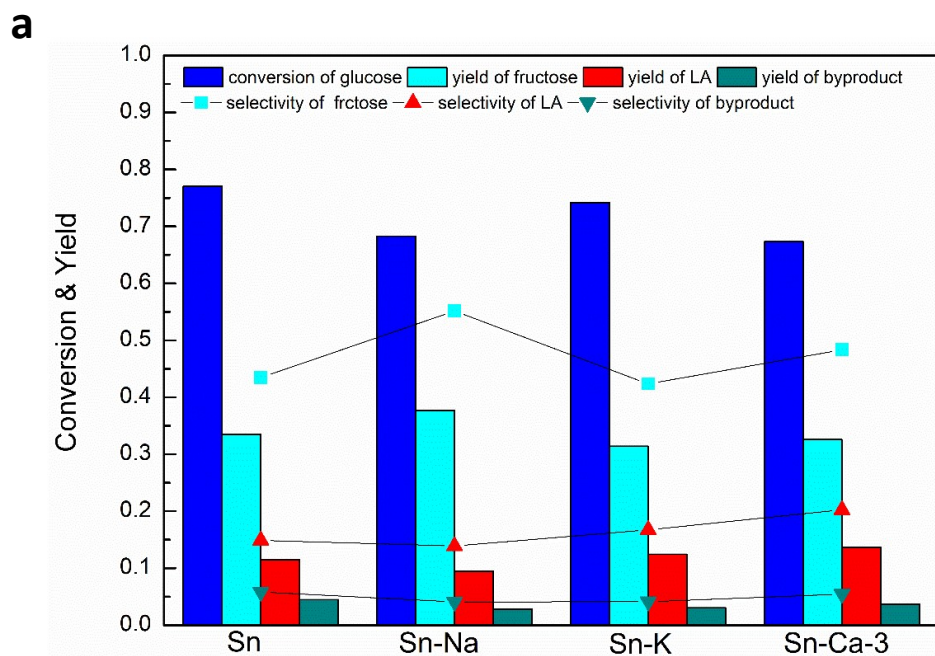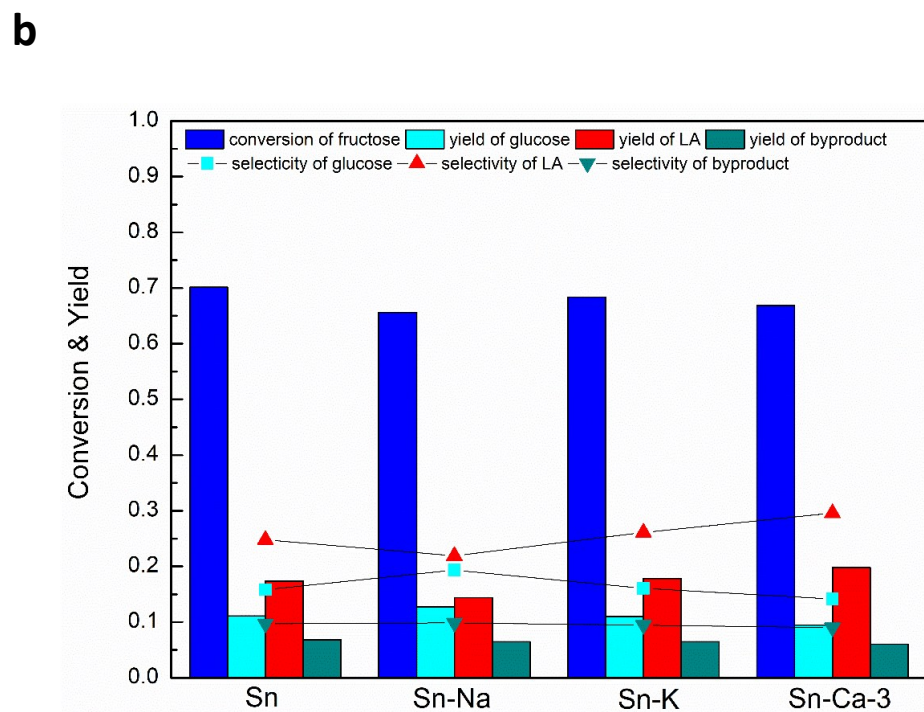

**Figure S6.** Conversion of glucose (a) and fructose (b) over ion-exchanged Sn- $\beta$ .

Reaction conditions: cat. 100 mg; reactants 0.1 g; H<sub>2</sub>O 20 mL; N<sub>2</sub> 2 MPa; 150°C. Time 0.5 h.

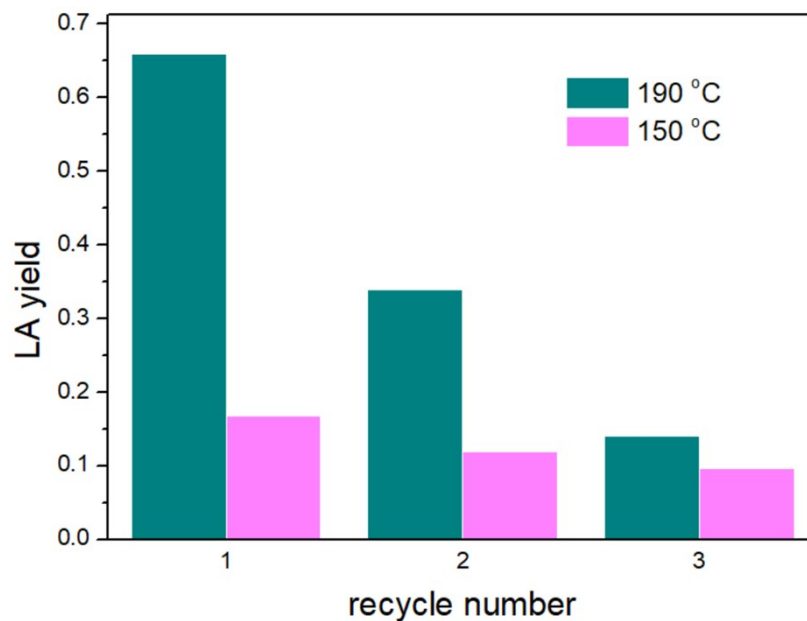

**Figure S7.** Recycling test of levoglucosan conversion to lactic acid over Sn- $\beta$ -Ca-3 at different temperatures. Reaction conditions: cat. 300 mg; lactic acid 0.2 mmol; levoglucosan 0.05 g; H<sub>2</sub>O 20 mL; N<sub>2</sub> 2 MPa; time 2 h.

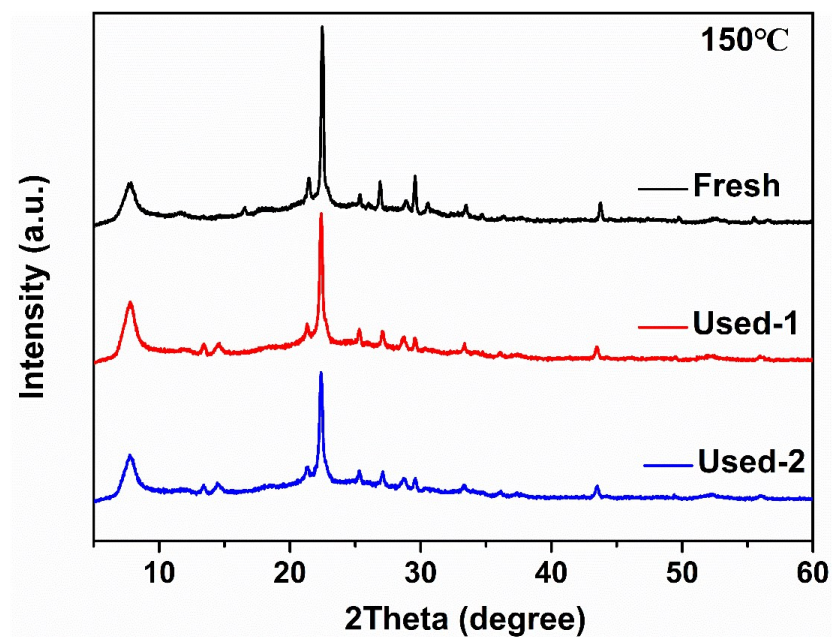

**Figure S8.** XRD patterns before and after levoglucosan conversion to lactic acid at 150 °C.
